# Supplementary material
Source: ML conference proceedings conference paper supplement (https://openaccess.thecvf.com/content/CVPR_2020/html/Chan_What_It_Thinks_CVPR_2020_paper.html)
Supplement: Supplementary file 1 [file Chan_What_It_Thinks_CVPR_2020_supplemental.pdf]

## A. IGAM Hyperparameters

The IGAM hyperparameters are fined through grid search through the same range of hyperparameter values within each transfer task. We report the values of the IGAM models whose results are reported in this paper for reproducibility.

### A.1. CIFAR-10 Target Task

**IGAM-MNIST**  $\lambda_{\text{adv}} = 1$ ,  $\lambda_{\text{diff}} = 100$ ,  $f_{\text{disc}}$  : 5 CNN layers (16-32-64-128-256 output channels) and updated once for every 10 classifier update steps

**IGAM-TranposeConv**  $\lambda_{\text{adv}} = 1$ ,  $\lambda_{\text{diff}} = 10$ ,  $f_{\text{disc}}$  : 5 CNN layers (8-16-32-64 output channels) and updated once for every 5 classifier update steps

**IGAM-RandomPad**  $\lambda_{\text{adv}} = 1$ ,  $\lambda_{\text{diff}} = 10$ ,  $f_{\text{disc}}$  : 5 CNN layers (8-16-32-64 output channels) and updated once for every 5 classifier update steps

**IGAM-Pad**  $\lambda_{\text{adv}} = 2$ ,  $\lambda_{\text{diff}} = 20$ ,  $f_{\text{disc}}$  : 5 CNN layers (8-16-32-64 output channels) and updated once for every 5 classifier update steps

**IGAM-Upsize**  $\lambda_{\text{adv}} = 5$ ,  $\lambda_{\text{diff}} = 10$ ,  $f_{\text{disc}}$  : 5 CNN layers (8-16-32-64 output channels) and updated once for every 5 classifier update steps

### A.2. CIFAR-100 Target Task

**IGAM-MNIST**  $\lambda_{\text{adv}} = 0.1$ ,  $\lambda_{\text{diff}} = 200$ ,  $f_{\text{disc}}$  : 5 CNN layers (16-32-64-128-256 output channels) and updated once for every 5 classifier update steps

**IGAM-CIFAR10**  $\lambda_{\text{adv}} = 2$ ,  $\lambda_{\text{diff}} = 10$ ,  $f_{\text{disc}}$  : 5 CNN layers (16-32-64-128-256 output channels) and updated once for every 10 classifier update steps

### A.3. Tiny-ImageNet Target Task

**IGAM-CIFAR10-Resize**  $\lambda_{\text{adv}} = 0.1$ ,  $\lambda_{\text{diff}} = 200$ ,  $f_{\text{disc}}$  : 4 CNN layers (8-16-32-64 output channels) and updated once for every 5 classifier update steps

**IGAM-CIFAR10-Crop**  $\lambda_{\text{adv}} = 2$ ,  $\lambda_{\text{diff}} = 50$ ,  $f_{\text{disc}}$  : 4 CNN layers (8-16-32-64 output channels) and updated once for every 5 classifier update steps

**IGAM-CIFAR100-Resize**  $\lambda_{\text{adv}} = 0.1$ ,  $\lambda_{\text{diff}} = 200$ ,  $f_{\text{disc}}$  : 4 CNN layers (8-16-32-64 output channels) and updated once for every 5 classifier update steps

**IGAM-CIFAR100-Crop**  $\lambda_{\text{adv}} = 0.5$ ,  $\lambda_{\text{diff}} = 200$ ,  $f_{\text{disc}}$  : 4 CNN layers (8-16-32-64 output channels) and updated once for every 5 classifier update steps

## B. Proof

**Theorem B.1.** *The global minimum of  $L_{\text{adv}}$  is achieved when  $J_s = J_t$ .*

*Proof.* From [7], the optimal discriminator is

$$f_{\text{disc}}^*(J) = \frac{p_{\text{teacher}}(J)}{p_{\text{teacher}}(J) + p_{\text{student}}(J)} \quad (19)$$

We can include the optimal discriminator into Equation (10) to get

$$\begin{aligned} L_{\text{adv}} &= \mathbb{E}_{J \sim p_{\text{teacher}}} [\log f_{\text{disc}}^*(J)] + \mathbb{E}_{J \sim p_{\text{student}}} [\log(1 - f_{\text{disc}}^*(J))] \\ &= \mathbb{E}_{J \sim p_{\text{teacher}}} \left[ \log \frac{p_{\text{teacher}}(J)}{p_{\text{teacher}}(J) + p_{\text{student}}(J)} \right] \\ &\quad + \mathbb{E}_{J \sim p_{\text{student}}} \left[ \log \frac{p_{\text{student}}(J)}{p_{\text{teacher}}(J) + p_{\text{student}}(J)} \right] \\ &= KL \left( p_{\text{teacher}} \parallel \frac{p_{\text{teacher}} + p_{\text{student}}}{2} \right) \\ &\quad + KL \left( p_{\text{student}} \parallel \frac{p_{\text{teacher}} + p_{\text{student}}}{2} \right) - \log 4 \\ &= 2 \cdot JS(p_{\text{teacher}} \parallel p_{\text{student}}) - \log 4 \end{aligned} \quad (20)$$

where  $KL$  and  $JS$  are the Kullback-Leibler and Jensen-Shannon divergence respectively. Since the Jensen-Shannon divergence is always non-negative,  $L_{\text{adv}}(G)$  reaches its global minimum value of  $-\log 4$  when  $JS(p_{\text{teacher}} \parallel p_{\text{student}}) = 0$ . When  $J_s = J_t$ , we get  $p_{\text{teacher}} = p_{\text{student}}$  and consequently  $JS(p_{\text{teacher}} \parallel p_{\text{student}}) = 0$ , thus completing the proof.  $\square$

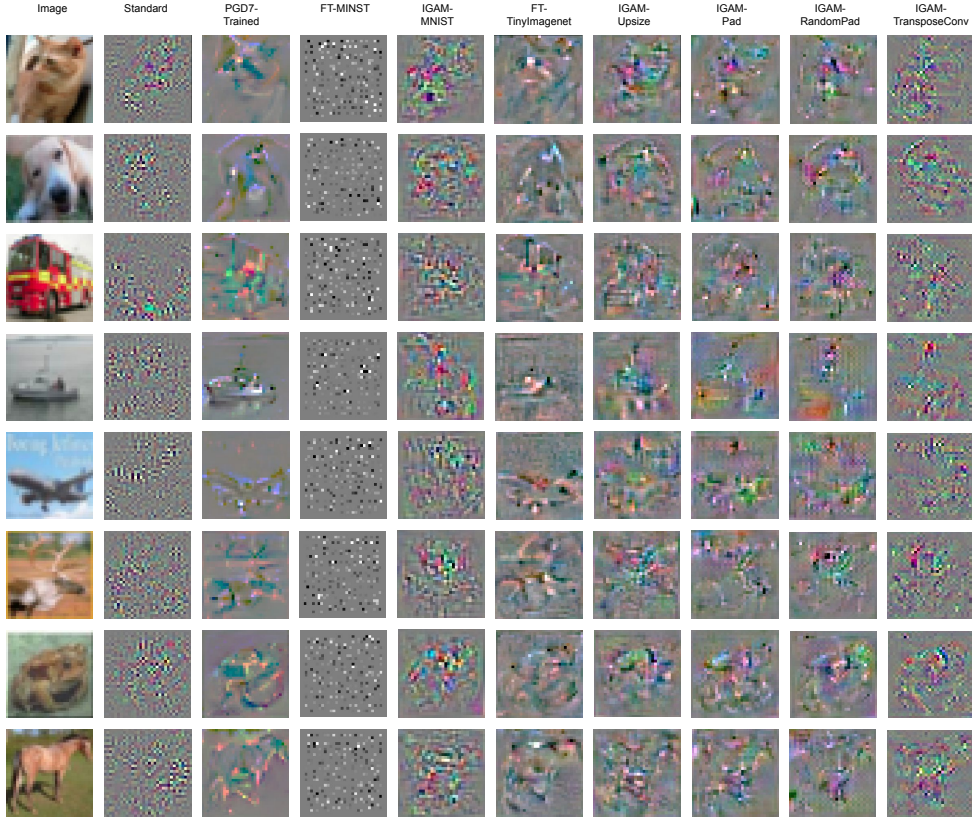

Figure 6: Input gradients of different models.

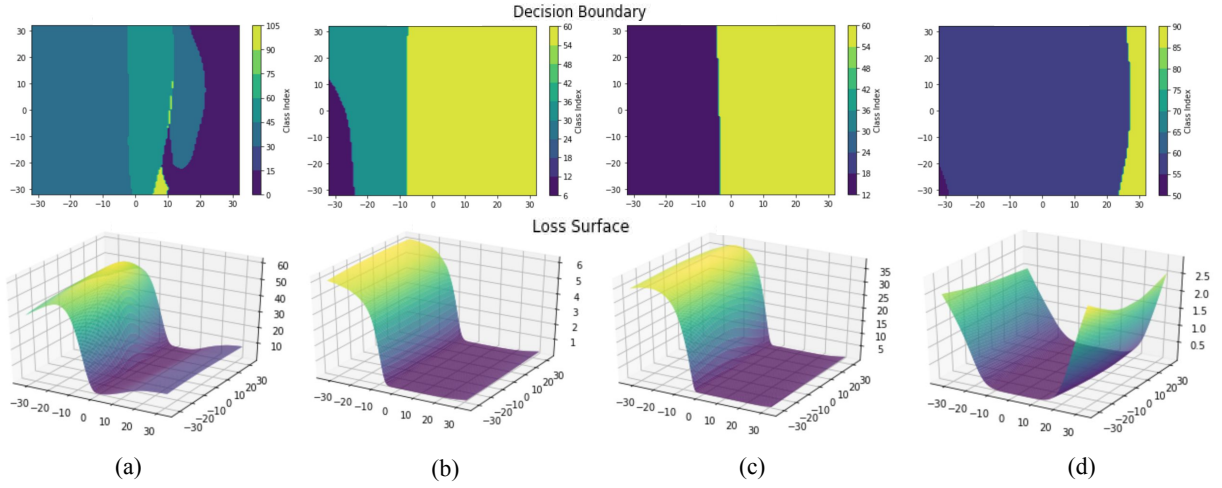

Figure 7: Decision boundaries and loss landscapes of (a) standard trained, (b) IGAM-CIFAR10 ( $\lambda_{adv} = 2, \lambda_{diff} = 0$ ), (c) IGAM-CIFAR10 ( $\lambda_{adv} = 0, \lambda_{diff} = 10$ ) and (d) IGAM-CIFAR10 ( $\lambda_{adv} = 2, \lambda_{diff} = 10$ ) along the adversarial perturbation and a random direction. Correct class: #53.
